1 **Transcriptomic analysis of quinoa reveals a group of germin-like proteins induced by**

2 ***Trichoderma***

3 Oscar M. Rollano-Peñaloza, Instituto de Investigaciones en Productos Naturales, Universidad Mayor de San  
4 Andrés, Campus Universitario Cota Cota c 27, La Paz, Bolivia; and Department of Biology, Lund University,  
5 Sölvegatan 35B, SE-223 62 Lund, Sweden

6 [oscar\\_miguel.rollano\\_penaloza@biol.lu.se](mailto:oscar_miguel.rollano_penaloza@biol.lu.se) and [bios.mrp@gmail.com](mailto:bios.mrp@gmail.com)

7 Patricia A. Mollinedo, Instituto de Investigaciones en Productos Naturales, Universidad Mayor de San Andrés,  
8 Campus Universitario Cota Cota c 27, La Paz, Bolivia

9 [pattymollinedo@gmail.com](mailto:pattymollinedo@gmail.com)

10 Susanne Widell, Department of Biology, Lund University, Sölvegatan 35B, SE-223 62 Lund, Sweden

11 [susanne.widell@biol.lu.se](mailto:susanne.widell@biol.lu.se)

12 Allan G. Rasmusson, Department of Biology, Lund University, Sölvegatan 35B, SE-223 62 Lund, Sweden

13 [Allan.rasmusson@biol.lu.se](mailto:Allan.rasmusson@biol.lu.se)

14

15 Corresponding author: Allan G. Rasmusson

## 16 **Abstract**

17 Symbiotic strains of fungi in the genus *Trichoderma* affect growth and pathogen resistance of many plant species,  
18 but the interaction is not known in molecular detail. Here we describe the transcriptomic response of two cultivars  
19 of the crop *Chenopodium quinoa* to axenic co-cultivation with *Trichoderma harzianum* BOL-12 and *Trichoderma*  
20 *afroharzianum* T22. The response of *C. quinoa* roots to BOL-12 and T22 in the early phases of interaction was  
21 studied by RNA sequencing and RT-qPCR verification. Interaction with the two fungal strains induced partially  
22 overlapping gene expression responses. Comparing the two plant genotypes, a broad spectrum of putative quinoa  
23 defense genes were found activated in the cultivar Kurmi but not in the Real cultivar. In cultivar Kurmi, relatively  
24 small effects were observed for classical pathogen response pathways but instead a *C. quinoa*-specific clade of  
25 germin-like genes were activated. Germin-like genes were found to be more rapidly induced in cultivar Kurmi as  
26 compared to Real. The same germin-like genes were found to also be upregulated systemically in the leaves. No  
27 strong correlation was observed between any of the known hormone-mediated defense response pathways and any  
28 of the quinoa-*Trichoderma* interactions. The differences in responses are relevant for the capabilities of applying  
29 *Trichoderma* agents for crop protection of different cultivars of *C. quinoa*.

## 30 **Background**

31 *Trichoderma* is a genus of ascomycete fungi widely studied for its versatile interactions with other organisms.  
32 *Trichoderma* can feed or parasitize on other fungi, bacteria, oomycetes and nematodes. Several species of  
33 *Trichoderma* are also symbionts with plants and can promote plant growth by several, yet so far only partially  
34 known mechanisms. Strains of several symbiotic species in the *Trichoderma harzianum* species complex (e.g.  
35 *Trichoderma afroharzianum* T22 (1), previously called *T. harzianum*) are used commercially because they can  
36 substantially improve yields of several species of crops. The strain T22 can enrich the soil nutrient availability to  
37 plants (2), and several species of *Trichoderma* have also been shown to enhance plant growth through volatile  
38 compound emission (3, 4) and stimulate plant systemic defense responses (5, 6). Nevertheless, plants do not always  
39 benefit from these interactions as described for some maize cultivar in field trials and lab experiments (7). Plant  
40 growth inhibition by *T. harzianum* has also been observed in axenic co-cultures with quinoa seedlings (8).

41 Quinoa (*Chenopodium quinoa* Willd.) is an emerging crop of great interest due to its nutritional values (9) and its  
42 resistance to hostile environmental conditions, especially salinity and drought (10, 11). Quinoa seeds are gluten-  
43 free, contain all essential amino acids and its composition (vitamins, antioxidants, fatty acids and minerals) is

44 highly suitable for human nutrition (12). Quinoa has a high genetic diversity, e.g. more than 4,000 accessions have  
45 been registered by the Food and Agriculture Organization (13). The high genetic diversity of cultivars is the result  
46 of many years of selection by the indigenous people of the Andean Altiplano, where quinoa may have been  
47 domesticated 7,000 years ago by pre-Columbian cultures (14).

48 Quinoa agricultural yields can be boosted by *Trichoderma* application, as previously described (15). However, the  
49 outcome of plant-*Trichoderma* interactions is not always beneficial. Plant genotype-specific growth inhibition by  
50 commercially available *Trichoderma* strains have been reported for lentils (16), tomato (17) and maize (7). Thus,  
51 the incompatibility of particular plants with particular biocontrol strains can lead to undesired agricultural losses.  
52 Therefore, there is a need to understand the genotype-specific interaction mechanisms that determine whether plant  
53 growth is promoted or inhibited by biocontrol agents like T22.

54 In this work, we have studied the molecular response mechanisms of two *C. quinoa* cultivars that experienced  
55 plant growth inhibition when treated with *T. harzianum* BOL-12 and *T. afroharzianum* T22 in axenic co-cultures.  
56 The response of quinoa to BOL-12 and T22 in the early phases of interaction was studied by transcriptomic  
57 analysis and RT-qPCR verification. Overall, we observed that upon interaction with the two fungal strains, a broad  
58 spectrum of putative quinoa defense genes were activated in Kurmi but not in the Real cultivar.

## 59 **Methods**

### 60 **Biological materials**

61 Seeds of quinoa (*Chenopodium quinoa* Willd.) cultivars Maniqueña Real (*Real*) and Kurmi were kindly supplied  
62 by PROINPA (Quipaquipani, Bolivia). *Trichoderma afroharzianum*, Rifai, T22, anamorph ATCC 20847 (1) was  
63 purchased from the American Type Culture Collection (Manassas, VA, USA). *Trichoderma harzianum* BOL-  
64 12QD (BOL-12) was isolated and provided by the Instituto de Investigaciones Farmaco-bioquímicas (IIFB-  
65 UMSA, La Paz, Bolivia).

### 66 **Fungal growth**

67 T22 and BOL-12 were maintained on potato dextrose agar (BD-Difco, Detroit, USA) at 25°C. To isolate  
68 conidiospore suspensions, one ml of sterile water was added to two-week-old *Trichoderma* cultures on potato  
69 dextrose agar and collected spores were filtered through a sterile piece of cotton wool. The spores were washed

70 twice with sterile ddH<sub>2</sub>O and pelleted at 3700g for 5 min at 4 °C in an Allegra X-12R centrifuge (Beckman, Brea,  
71 CA, USA). Spores were resuspended in sterile ddH<sub>2</sub>O and kept at 4°C until experiments.

72 Germination of T22 and BOL-12 spores for *C. quinoa* treatment was performed as described by Yedidia,  
73 Benhamou (18) using 15 ml tubes shaken at 200 rpm for 18 h. The germinated spore suspension was washed twice  
74 by centrifugation as described above and finally resuspended in sterile ddH<sub>2</sub>O. The final spore concentration was  
75 adjusted to be 1 germinated spore/μl and verified by colony forming unit (CFU) counts in potato dextrose agar  
76 Petri dishes.

#### 77 **Sterilization of *C. quinoa* seedlings and germination**

78 Seeds of *C. quinoa* were surface-sterilized by soaking in commercial bleach (NaClO; 27 g/kg) for 20 min.,  
79 followed by 6 rinses in sterile ddH<sub>2</sub>O. Immediately thereafter, the seeds were placed on sterile water agar (8 g/L)  
80 in Petri dishes and incubated in darkness at 24°C for 14 hours (8).

#### 81 **Co-culture of quinoa and *T. harzianum* in Petri dishes**

82 Five germinated axenic seedlings of each cultivar Kurmi and Real with similar root length were aligned on a  
83 straight line on 12x12 cm square Petri dishes containing 0.1X Murashige and Skoog Basal Salts Mixture (MS;  
84 Duchefa, Haarlem, The Netherlands), supplemented with 8 g/L agar. The Petri dishes were then tilted 45° during  
85 growth with the agar/air interface facing upwards and seedlings having the roots pointing towards the bottom part  
86 of the Petri dish. The seedlings were incubated at 24°C for 4 hours before treatment with T22 or BOL-12.

87 *C. quinoa* seedlings were treated by adding 10 μl [1 CFU/μl] of either T22 or BOL-12 germinated spore suspension  
88 on the neck of the primary root. Ten μl of sterile ddH<sub>2</sub>O was added to each seedling in the mock control group.  
89 After treatment, the seedlings were incubated at 24°C in a 16 h light /8 h dark photoperiod. Co-cultivation was  
90 done under fluorescent lights (Polylux XLR 30W, GE, Budapest, Hungary) at 50 μmol m<sup>-2</sup> s<sup>-1</sup> for 12 and 36 hours.

#### 91 **Seedling growth analysis**

92 Hypocotyl length was analyzed from images taken with a Digital Camera Canon EOS Rebel T3. Measurements  
93 from the photographs were done with the segmented line tool of *ImageJ* 1.49 (19).

#### 94 **Sample collection and RNA extraction**

95 For RNA extraction quinoa seedling were sampled 12 and 36 h after *Trichoderma* treatment as follows. The roots  
96 were excised at the root-hypocotyl interface with a scalpel. One root from each of five plates per treatment was

97 pooled into one replicate on pre-weighed aluminum foil envelopes. The envelopes were weighed on a precision  
98 balance and shock-frozen in liquid nitrogen. Frozen samples were either processed immediately or stored at -80°C  
99 until RNA extraction. Roots and shoots were pooled separately.

100 Total RNA was extracted using the RNeasy Plant Mini Kit (Qiagen, Valencia, CA, USA), with the following  
101 modification: Root tissue samples preserved in liquid nitrogen were placed in a precooled mortar containing liquid  
102 nitrogen followed by thoroughly grinding without letting the samples thaw. Then 450 µL of Buffer RLT (Qiagen,  
103 Valencia, CA, USA) supplemented with B-mercaptoethanol (1%) was added. Grinding continued until samples  
104 thawed and were transferred to a 1.5 ml microcentrifuge tube. The rest of the procedure was followed according  
105 to Qiagen instructions. Total RNA quantity and quality was determined with a NanoDrop spectrophotometer.  
106 DNase treatment was performed with the DNA-free kit (Ambion, Carlsbad, CA, USA), following the instructions  
107 of the manufacturer. The integrity and quality of the RNA was determined as follows: 500 ng. of DNase-treated  
108 RNA were dissolved in 8 µl of sterile water and split it in two aliquots, one placed on ice and the other placed at  
109 37°, both for 20 minutes, immediately 2 µl of loading buffer was added to each sample and together were loaded  
110 to an agarose gel (2%) stained with ethidium bromide. The gel was run at 80V for 30 min and visualized in an  
111 UV-transilluminator. Samples with sharp 18S and 28S rRNA and showing no evidence of degradation were  
112 retained.

### 113 **RNA-seq library construction and sequencing**

114 Total RNA treated with DNase was sent to IGA technology services (IGA, Udine, Italy;  
115 <http://www.igatechnology.com>) for poly(A)<sup>+</sup> mRNA purification, strand-specific cDNA synthesis, library  
116 construction (Truseq stranded mRNA-seq) and sequencing using a HiSeq2500 (Illumina Inc., San Diego, CA,  
117 USA) in paired-end mode with a read length of 125 bp. Raw sequences have been deposited at the National Center  
118 of Biotechnology Information NCBI under the Sequence Read Archive (SRA): SUB9370528.

### 119 **Transcriptomic analysis**

120 RNA-seq reads were checked for quality by FastQC (v.0.9.0) and mapped on the quinoa genome “Kd” (Yasui et  
121 al., 2016) and to the QQ74 coastal genome (20) by Tophat2 (v.2.2.9). Transcript abundances were assessed with  
122 HTSeq (v.0.9.1) with “intersection-nonempty” mode. Genes that had a minimum of 1 read mapped in each of the  
123 samples considered for analysis were included. Gene expression levels were measured as counts per million (CPM)  
124 (21). Library size normalization was performed using the trimmed mean of *M*-values (TMM) within the R package

125 edgeR (v.3.14.0) (22, 23). Differential gene expression analysis (treated vs mock-treated) was performed using  
126 edgeR with TMM normalized libraries (21) with a false discovery rate (FDR) of 5% ( $q < 0.05$ ) (24).

### 127 **Functional annotation of differentially expressed genes**

128 Gene ontology (GO) term enrichment for sets of differentially expressed genes were estimated with Argot2 through  
129 sequence function prediction (25). Singular enrichment analysis (SEA) for biological processes was performed  
130 with AgriGO v2.0 (26). The statistical test for SEA was Fisher's exact test and for false discovery rate the Yekutieli  
131 method was applied (27).

### 132 **cDNA synthesis and gene expression by qRT-PCR analysis**

133 Synthesis of cDNA was carried out with 500 ng of total RNA added to each 20  $\mu$ l reaction of the RevertAid H  
134 Minus Reverse Transcription Kit (Thermo Scientific). The cDNA samples were stored at  $-20^{\circ}\text{C}$  for downstream  
135 analysis. qRT-PCR of plant RNA was performed in a CFX384 Touch Real-Time PCR system (Bio-Rad, Hercules,  
136 CA, United States) using Maxima SYBR Green qPCR Master Mix (Thermo Scientific) supplemented with 0.25  
137  $\mu\text{M}$  of each specific primer and 10 ng of cDNA as template in a total volume of 10  $\mu\text{l}$ /reaction. The PCR program  
138 had the following conditions: 1 cycle of:  $95^{\circ}\text{C}$ , 20 s; 30 cycles of: ( $95^{\circ}\text{C}$ , 15 s;  $60^{\circ}\text{C}$ , 20s;  $72^{\circ}\text{C}$ , 20s). The  
139 specificity of each PCR amplification was determined by melting curve analysis and by analysis in 2% agarose  
140 gels. The primer sequences can be found in Table S7. The relative transcript expression was calculated by the  
141 Pfaffl algorithm using, *CqACT2A* and *CqMON1*, as reference genes. Ten-fold dilutions of cDNA template were  
142 used to determine the amplification efficiency for each gene (28).

143 Primer pairs were designed using Perlprimer (29) so that one of the primers in each pair spanned an exon-exon  
144 border, and the primer pairs were additionally checked using Netprimer ([premierbiosoft.com](http://premierbiosoft.com)) to avoid primer-  
145 primer interactions.

### 146 **Protein evolution**

147 Protein alignments were made using Muscle (30). Aminoacid substitution models were evaluated by MEGA X  
148 (31). The protein evolutionary tree was performed by maximum likelihood using LG model (32) with gamma  
149 distribution (LG + G) and 95% limit for partial gaps. Total positions in the final dataset were 191. Bootstrap testing  
150 was conducted with 1000 replicates.

## 151 **Results**

### 152 ***Trichoderma* BOL-12 and T22 inhibit the growth of *C. quinoa* seedlings under certain axenic conditions**

153 Previously we have observed that quinoa growth was inhibited by two *Trichoderma* strains under axenic conditions  
154 (8). Therefore, we decided to investigate the axenic co-culture of quinoa with T22 and BOL-12 by gene expression  
155 analysis to detect the molecular signaling possibly responsible of the *C. quinoa* growth inhibition. Briefly, quinoa  
156 seedlings of cultivars Kurmi and Real were grown for 18 h in square petri dishes on 0.1x MS and 0.8% agar and  
157 co-cultivated with T22 or BOL-12 for 12 and 36 hours. The studied *Trichoderma* strains did not have any  
158 measurable effect on the growth of *C. quinoa* seedlings during this short time of co-cultivation. Thus, the growth  
159 pattern was consistent with previously reported.

### 160 **Transcriptome sequencing of *C. quinoa* in axenic co-culture with *Trichoderma***

161 RNA samples from quinoa roots treated with *Trichoderma* for 12 and 36 hours were collected. RNA samples at  
162 12 hours post inoculation (hpi) were analysed through RNA-seq and RNA samples at 36 hpi were evaluated  
163 through posterior qRT-PCR. For the transcriptomic analysis three biological replicates of each treatment were  
164 sequenced in paired-end mode. The final number of reads that passed the quality control varied between 10.2 and  
165 23.1 million paired-end reads of 125 bp per sample (Table 1). Reads were mapped to the draft quinoa genome of  
166 cultivar Kd as well as to the chromosome-level assembly of the quinoa genome cultivar QQ74 (Table 1). On  
167 average, the proportion of mapped reads was substantially increased when reads were mapped to the QQ74 quinoa  
168 genome (93.9 %), as compared to the draft Kd quinoa genome (71.8%). Therefore, all downstream analyses were  
169 performed with data mapped to the QQ74 genome.

### 170 **Differential gene expression in quinoa in response to *Trichoderma* treatment**

171 The differential gene expression analysis considered only reads that mapped to unique locations in the QQ74  
172 genome. The average number of reads that were mapped to unique locations in the QQ74 genome was 89.8%  
173 (Table 1). The remaining reads (10.2%) producing multiple alignments were discarded. Further, only quinoa genes  
174 with at least one read in each of the samples analysed were considered (Table 2). Gene expression levels were  
175 measured as counts per million (CPM) . CPM were TMM-normalized in order to compensate for library size  
176 differences. Differential gene expression analysis comparing mock-treated samples with samples treated with  
177 *Trichoderma* was performed with edgeR.

178 Quinoa roots in general induced more genes than they repressed upon interaction with *Trichoderma*, with the  
179 exception of Kurmi interacting with T22 where more genes were repressed than induced (Table 2). Kurmi treated  
180 with T22 showed 16 times more differentially expressed genes than in the treatment with BOL-12. Similarly,  
181 quinoa cv. Real treated with T22, compared to the mock-controls, had 5.5 times more differentially expressed  
182 genes than Kurmi in the treatment with BOL-12 (Table 2).

183 Regarding communal effects by both *Trichoderma* strains, we observed more genes differentially expressed in cv.  
184 Real (141 genes) than in cv. Kurmi (75 genes) (Tables S1-3). Among the quinoa genes up- or downregulated under  
185 one or several conditions, only 19 were communally differentially expressed in all experimental combinations,  
186 and all were induced (Figure 1, Table 3). That is, they were significantly induced during the interaction of each  
187 quinoa cultivar with each *Trichoderma* strain. The group of 19 differentially expressed genes were not significantly  
188 associated with any functional GO term upon analysis by SEA. However, the GO analysis suggests that 13 of the  
189 19 gene products are localized outside the cytoplasm. This indicates activity at the plasma membrane, the cell wall  
190 and the extracellular compartment, indicating functions relating to interactions with external stimuli (Table 3).

#### 191 **Quinoa genes differentially expressed unique to each cultivar**

192 We decided to analyze genes that were induced by *Trichoderma* and were uniquely expressed in each cultivar.  
193 The Kurmi cultivar upon interaction with either BOL-12 or T22, expressed 75 genes that were communally  
194 differentially expressed (DE) but were not differentially expressed upon either *Trichoderma* interaction in cv. Real  
195 (Figure 1 and 2, Table S1). The expression profiles of these genes were clustered by Euclidean distance and are  
196 shown in Figure 2. From the 75 DE genes in cv. Kurmi by both strains of *Trichoderma*, 59 genes were induced  
197 (Table S1), whereas 16 DE genes were repressed (Table S2). The 75 DE genes expressed in cv. Kurmi are  
198 expressed in cv. Real but are not responsive to the treatment with either of the *Trichoderma* strains (Figure 2).

199 Analysis of the 59 significantly induced genes revealed that 17 genes (*CqGLPs*) are highly expressed and share a  
200 high protein sequence identity (90%). These genes encode proteins that belong to the germin-like protein family  
201 (GLPs) (Figure 2; Table S1). Further, several genes involved in flavonoid biosynthesis were specifically  
202 responsive in Kurmi. We identified 9 genes whose orthologs in *Arabidopsis thaliana* are described to be involved  
203 in the flavonoid biosynthesis pathway. These differentially expressed genes are orthologs to four out of five  
204 enzyme-coding genes necessary for production of flavonol glycosides from naringenin, also known as chalcone  
205 (33) (Figure 2, Table S1).



206 The Real cultivar had 141 genes differentially expressed common to both *Trichoderma* strains tested (Figure 1,  
207 Table S3). The cv. Real response to both *Trichoderma* strains showed mostly activation of transcription factors  
208 and enzymes without a significant match to a known pathway. Among the genes that were differentially expressed  
209 there are 4 ethylene-responsive transcription factors, 9 probable WRKY transcription factors and 3 chitinases  
210 (Table S3).

211 Genes differentially expressed related to biotic interactions were observed in mayor proportions in quinoa cv.  
212 Kurmi than Real. Therefore, the focus of this study was on the response of the Kurmi cultivar. **Functional**  
213 **annotation of differentially expressed genes**

214 To assess the function of the differentially expressed genes we annotated the differentially expressed genes of all  
215 combinations with Gene Ontology (GO) terms for biological processes. The quinoa genome has 44 776 annotated  
216 genes (20) but the annotation with Argot only assigned GO terms to 50.5 % of the genes (i.e. 22 650 genes  
217 annotated with GO terms). Despite the low percentage of GO terms assigned, GO annotation for the biological  
218 process category in Kurmi plants treated with BOL-12 revealed defense response (GO:0006952) and response to  
219 biotic stimulus (GO:0009607) as the main and only processes associated to *Trichoderma* BOL-12 treatment (Table  
220 S4). In contrast, the interaction between Kurmi and T22 did not show any significant GO term for biological  
221 processes.

222 Quinoa plants of the Real cultivar had more genes associated to GO terms than Kurmi. However, no specific  
223 association to a cluster of similar GO terms were observed (Table S4). Specifically, Real treated with T22 showed  
224 38 genes that were annotated to response to stress (GO:0006950) and 6 genes that were annotated to chitin  
225 catabolic processes (GO:0006032) and associated redundant GO terms (Table S4). Further, Real treated with BOL-  
226 12 did not show any GO terms directly associated to defense response or response to stress, yet highest significance  
227 was observed to GO terms for cell wall related processes (Table S4). Nonetheless, in the interaction between Real  
228 and each strain of *Trichoderma* we observed several genes related to defense being commonly activated. Among  
229 them WRKY transcription factors (9 differentially expressed genes), ethylene-responsive genes (4 differentially  
230 expressed genes) and chitinases (3 differentially expressed genes) (Table S3).

### 231 **Validation of RNA-seq with qRT-PCR**

232 Quinoa root transcriptomes have not previously been analysed. We therefore validated the gene expression data  
233 obtained by RNA-seq by performing qRT-PCR for 10 selected genes, including induced, repressed and stably

234 expressed genes (Figure 3, Table S5). A log-log linear model analysis of the RNA-seq data and the qRT-PCR data  
235 showed a strong correlation ( $R^2$ ) of 0.848. The correlation was higher when the different quinoa-*Trichoderma*  
236 interaction pairs were assessed independently (Table S5).

### 237 **Changes in root gene expression at 36 hpi**

238 Time changes in the expression of quinoa genes by *Trichoderma* treatment were assessed by qRT-PCR at 36 hpi.  
239 We followed time-dependent changes in two highly induced genes (*CqGLP1* and *CqGLP10*) representing the GLP  
240 family and one gene that was induced in all quinoa-*Trichoderma* interactions (*CqHSP83*). The gene expression of  
241 *CqGLP1* and *CqGLP10* was reduced at 36 hpi compared to 12 hpi in the Kurmi cultivar but its expression was  
242 still higher than the mock-treatment. In contrast, the gene expression of *CqGLP1* and *CqGLP10* in the Real cultivar  
243 was higher at 36 hpi than at 12 hpi, being statistically significant in the Real - BOL-12 interaction (Figure 4). The  
244 *CqHSP83* gene maintained its level of gene expression between 12 hpi and 36 hpi by application of T22 in both  
245 cultivars. In contrast, the application of BOL-12 to both cultivars downregulated *CqHSP83* gene expression at 36  
246 hpi as compared to 12 hpi. However, the downregulation was only significant in the Kurmi cultivar (Figure 4).  
247 Overall, the results indicate that the induction of the analysed genes is slower in cv. Real than in cv. Kurmi.

### 248 **Shoot gene expression**

249 We investigated changes in the quinoa shoot gene expression 36 h after *Trichoderma* treatment at the root neck  
250 (Figure 5). Ten out of 12 genes investigated were also expressed in the shoots, *CqPER39* and *CqPRIC* gene  
251 expression was not detected at the shoots in any of the combinations studied (Table S6). *Trichoderma*-induced  
252 gene expression changes at the shoots (Figure 5) showed a generally similar pattern of gene expression as observed  
253 in the roots at 36 hpi (Figure 4). *CqGLP1* and *CqGLP10* are significantly expressed in both cultivars upon  
254 interaction with BOL-12 but not with T22. Likewise, *CqHSP83* is significantly expressed in both cultivars when  
255 interacting with T22 but not when interacting with BOL-12 (Figure 5). The other genes did not show a significant  
256 correlation in the Shoot-root expression in any of the quinoa-*Trichoderma* interactions studied (Table S6).

### 257 **Evolutionary analysis of the germin-like proteins**

258 Plant germins were first investigated and have been characterised in most functional detail in cereals (34). To  
259 investigate the coincidental induction of germin-like proteins in cv. Kurmi (Table S1), we carried out BLAST  
260 searches to identify all germin and germin-like homologues in *C. quinoa*, *Beta vulgaris*, *A. thaliana* and *Hordeum*  
261 *vulgare* and performed alignments and evolutionary analyses. We found that 16 of the 17 quinoa GLPs induced by

262 *Trichoderma* (highlighted in green) in cv. Kurmi belong to a single (98% bootstrap) *C. quinoa*-specific clade of  
263 29 homologues (Figure 6 and Table S8). The remaining GLP induced by *Trichoderma* (*CqGLP20*) groups in an  
264 unresolved putative clade, which contains four quinoa GLPs and one sugarbeet GLP (Figure 6). The relation of  
265 the quinoa-specific clade to homologues in other species, including the closest relative *B. vulgaris*, was not  
266 resolved, whereas other groups of quinoa germin-like proteins were significantly associated with specific  
267 homologues in *B. vulgaris*. Species-specific gene groups were also observed for *B. vulgaris* and *A. thaliana*. The  
268 result suggests that recent expansions of gene groups have occurred independently in the amaranth family species  
269 *C. quinoa* and *B. vulgaris*.

## 270 **Discussion**

271 The outcome of plant-*Trichoderma* interactions with respect to both growth and physiological changes has been  
272 shown to be genotype-specific regarding both the plant and the *Trichoderma* biomaterial (5, 17). Here, we have  
273 observed a small set of quinoa genes being responsive in all combinations of *Trichoderma* strains and quinoa  
274 cultivars studied. However, we have found many more genes that are differentially expressed by a specific quinoa  
275 cultivar in response to either or both of two *Trichoderma* strains (Figure 1). Nonetheless, the outcome of the  
276 interaction of *Trichoderma* on plant growth in axenic co-cultures is negative for plants, similarly for both quinoa  
277 cultivars and consistent with previous observations (8).

278 The set of 19 genes that showed significant responses in all cultivar-strain combinations mainly include genes  
279 connected to biotic stress response and cell wall modification (Table 3). Orthologs of these genes are known to be  
280 involved in defense response. For example, the polygalacturonase inhibitor protein *AtPGIP1* (AT5G06860) in *A.*  
281 *thaliana* is thought to inhibit cell wall pectin degrading enzymes, commonly produced by fungal pathogens (35).  
282 Xyloglucan endotransglucosylase/hydrolases are cell wall repairing enzymes, many of which are induced by  
283 fungal infection (36). Further, two highly similar (protein sequence identity of 94,3%) heat-shock proteins  
284 (*CqHSP83A* and *CqHSP83B*) annotated to be involved in general stress responses (GO:0006950) were upregulated  
285 in all quinoa-*Trichoderma* interactions. Large heat-shock proteins (70 – 90 kDa) are known to be involved in plant  
286 defense response through the stabilization of protective plant proteins (37-39). The heat-shock proteins expressed  
287 by quinoa might have been induced to contribute to the stabilization of defense proteins that would prevent or  
288 counteract damages induced by *Trichoderma* (8).

289 Several differences in the defense response patterns between the quinoa cultivars were observed. Especially, the  
290 Kurmi cultivar that displays specific activation of several homologs to biotic stress-associated plant genes (Table  
291 S1-2). In contrast, the responsive genes in cv. Real were mostly involved in general cellular processes (Table S3),  
292 and to a lesser extent involving defense response genes. The defense response gene set induced in cv. Real was  
293 also completely different from the one activated in Kurmi (Figure 1, Table 2 and Table S1-3). Surprisingly, in  
294 neither case an obvious association to known major pathogen response pathways like jasmonic acid, salicylic acid  
295 or ethylene pathways (40-42) could be observed in the GO analysis at 12 hpi. The low association of the quinoa  
296 differentially expressed genes with these known pathways could, however, be caused by the relatively low level  
297 of GO annotation observed for the quinoa genome.

298 The quinoa genes specifically induced in the Kurmi cultivar upon interaction with *Trichoderma* (Table S1)  
299 resemble a set of defense response genes observed in plant-pathogenic interactions (43). Several of these induced  
300 genes (chalcone synthase, chalcone isomerase, flavonol synthase, UDP glycosyl transferase and *cis*-zeatin O-  
301 glucosyltransferase) belong to the flavonoid biosynthetic pathway (33). Flavonoids have an important role in plant  
302 defense (43, 44). For example, some *A. thaliana* mutants lacking the UDP glycosyl transferase gene (*AtUGT74F1*)  
303 are more susceptible to *Pseudomonas syringae* infection than the wild-type (45). Further, a QTL analysis for  
304 pathogen resistance in soybean identified two UDP glycosyl transferase genes as the candidate genes responsible  
305 for resistance to *Fusarium* (46). Thus, the Kurmi cultivar might be producing flavonol glycosides in order to  
306 prevent damage from *Trichoderma* overgrowth.

307 The Kurmi cultivar specifically induced several plant defensins that belongs to the germin and GLP family (Figure  
308 6 and Table S1). The *Trichoderma*-responsive GLPs form a majority (16 genes out of 29) of a recently expanded  
309 quinoa-specific clade (Figure 6, Table S8), which are thus strongly connected to *Trichoderma* interaction. Two of  
310 the GLP genes were further tested, and were found to be also induced in leaves (Figure 5). The timing of the  
311 induction further indicated that GLPs are induced in both Kurmi and Real, albeit more slowly in Real (Figure 4).  
312 Especially studied in grains like barley, GLPs are plant proteins involved in defense response and characterized  
313 by various enzymatic activities including oxalate oxidase (OXO), superoxide dismutase (SOD), ADP-glucose  
314 pyrophosphatase/ phosphodiesterase (AGPPase) and polyphenol oxidase (PPO) (47, 48). A potential function of  
315 germin-like proteins (GLPs) is found in its OXO and SOD activities, which may play a key role in production of  
316 hydrogen peroxide (H<sub>2</sub>O<sub>2</sub>) during plant defense (34). Because of a potential major importance of GLP in protecting  
317 cells from superoxide toxicity produced under pathogen attacks, germin or GLP genes (i.e. *HvOXO1*) have been

318 inserted into dicot plants like rapeseed or peanut to enhance its pathogen resistance (48-50). Given that several  
319 quinoa GLPs were expressed upon interaction with *Trichoderma*, it is very likely that these GLP defensins have  
320 an important role in the plant immune response of quinoa. Resistance to microbe attacks has been previously  
321 connected to the speed of response in different cultivars (51, 52). Thus, the rapid induction of a cluster of GLPs in  
322 both roots and leaves of Kurmi compared to Real (Table S2-3, Figure 4) makes these genes potential candidates  
323 for breeding to increase the tolerance to microbial attacks in quinoa plants.

324 The set of defense-related genes (peroxidases, chitinases, ERF and WRKY transcription factors) induced in quinoa  
325 cv. Real upon interaction with *Trichoderma* (Table S3) has been observed in *L. japonicus* roots upon 1 hour of  
326 incubation with chitin oligosaccharides (53). However, the levels of such defense-related genes returned to normal  
327 after 7 hours in *L. japonicus* whereas in quinoa remained induced after 12 hours, possibly due to the persistence  
328 of interaction with the living *Trichoderma* agent as compared to the transient nature of the elicitor. Similar to the  
329 *L. japonicus* system, the 24 h interaction of *Trichoderma* with *A. thaliana* resulted in the induction of the same  
330 defense-related genes as seen here in quinoa (54). This set of genes could thus be a basal gene response of plants  
331 after recognition of beneficial fungi like *Trichoderma* through chitin. In contrast, the Kurmi cultivar might have a  
332 different set of receptors that helps the plant to perceive a possible negative effect from *Trichoderma* and thus  
333 rapidly activate a different set of defense-related genes.

334 The plant root response to *Trichoderma* at transcriptomic level has been poorly studied compared to aerial parts  
335 (55). Nevertheless, it has been observed that in tomato roots the recognition of *Trichoderma* at 24 hpi activates  
336 ROS signaling, SA responses, cell wall modifications (56), JA responses and induction of plant defenses (54, 57).  
337 In our study, we have observed a similar pattern for ROS signaling, cell wall modifications and induction of plant  
338 defenses (Table 3, Table S1-3), confirming that the first response of root plants to beneficial fungi like  
339 *Trichoderma* is to activate defenses. Further, our study reveals that the defense response against beneficial fungi  
340 is variable between cultivars (Figure 2). The variable molecular response between cultivars to *Trichoderma*, could  
341 help to create molecular markers of compatibility between certain plant cultivars and certain strains of  
342 *Trichoderma*.

343 In conclusion, our study suggests that *Trichoderma* triggers a defense response in quinoa plants. Comparing the  
344 defense response of two quinoa cultivars we can observe that the Kurmi cultivar mainly induced a set of genes  
345 involved in plant defense. In contrast, the Real cultivar did not have a clear response because most of the changes

346 mediated by *Trichoderma* were related to general stress and regulation of biological processes. The Kurmi cultivar  
347 might have higher tolerance to microbe attacks due to the expression of genes involved in the biosynthesis of  
348 flavonol glycosides and a clade of GLP-defensins unique to quinoa. These genes are thus candidates for selection  
349 of quinoa cultivars with higher resistance to microbe attacks.

350

## 351 Figures

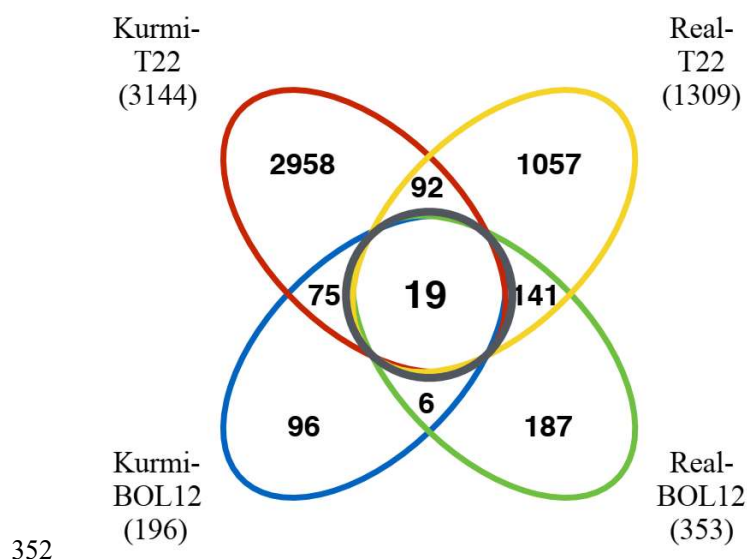

352  
353 **Figure 1 Venn diagram of quinoa genes differentially expressed in response to *Trichoderma*.** Quinoa genes  
354 differentially expressed were grouped according to the cultivars and *Trichoderma* strains studied. The black circle  
355 indicates genes differentially expressed in both quinoa cultivars by each of the *Trichoderma* strains tested. The  
356 numbers in parenthesis indicate the number of genes differentially expressed in each of the quinoa-*Trichoderma*  
357 interactions studied.

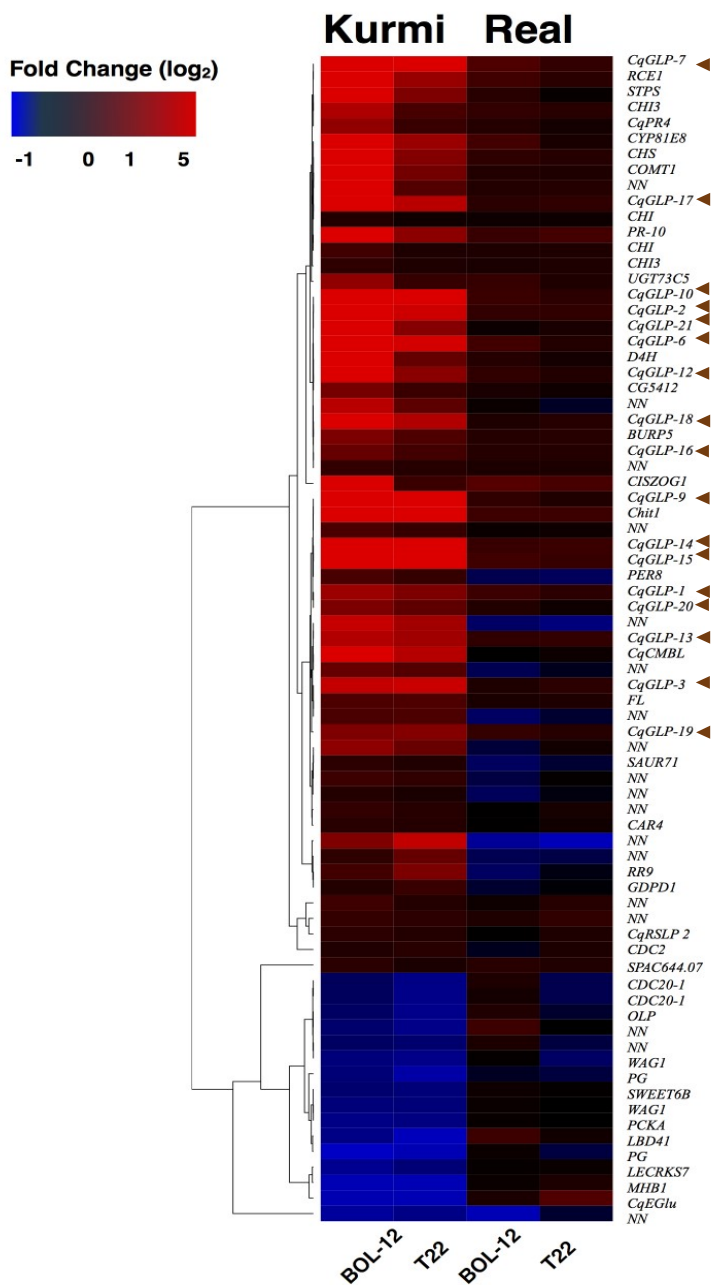

358

359 **Figure 2 Heatmap profile of genes responsive to BOL-12 and T22 in Kurmi but not in Real.** Genes  
 360 differentially expressed in cv. Kurmi in response to either *Trichoderma* strain, but not significantly responsive in  
 361 cv. Real, were analysed. Clustering by Euclidean distance shows the similarity in expressional change upon  
 362 *Trichoderma* treatment. Brown arrows indicate *CqGLPs*.

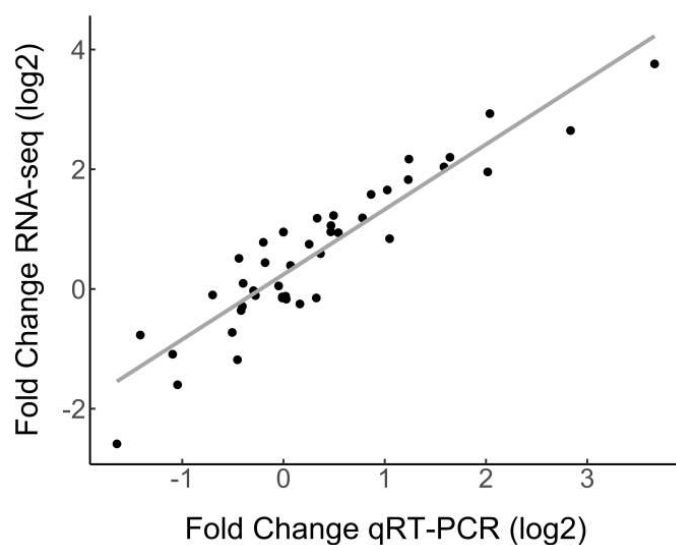

363

364 **Figure 3 Correlation of RNA-seq and qRT-PCR gene expression data.** Ten differentially expressed genes and  
365 two reference genes from the RNA-seq dataset were evaluated by qRT-PCR. Gene expression by qRT-PCR was  
366 normalized to the *CqAct2* reference gene. Fold change was measured by comparing samples treated with  
367 *Trichoderma* against mock- treated. The selected genes were assessed in all quinoa-*Trichoderma* combinations as  
368 averages of triple biological replicates. The Pearson correlation coefficient between the RNA-seq and qRT-PCR  
369 data was 0.921 (For data see Table S5).



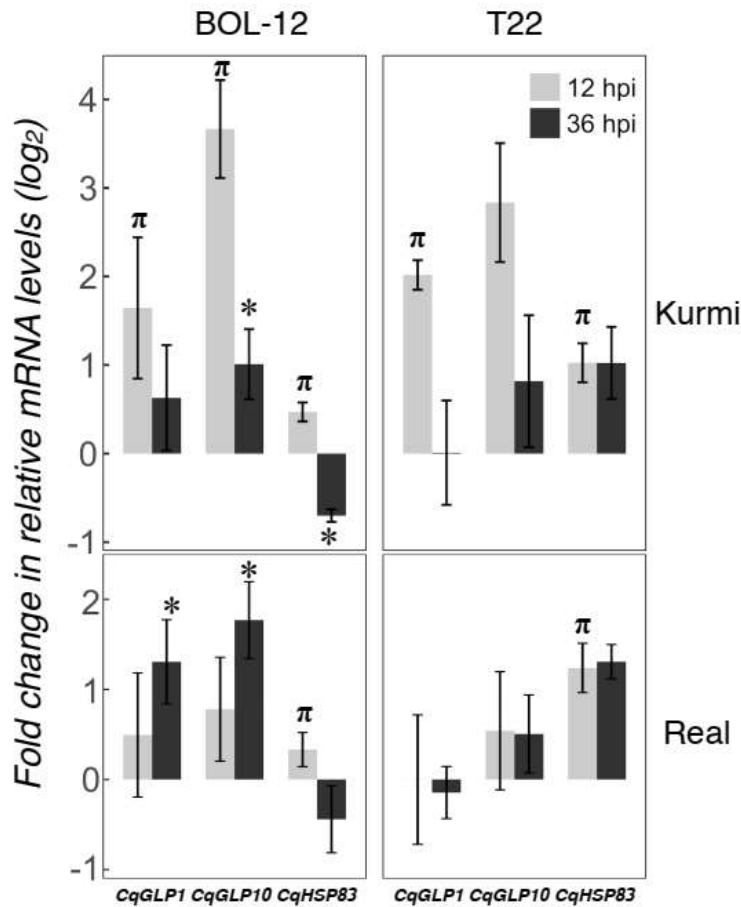

370

371 **Figure 4 Gene expression changes at 12 and 36 hpi in representative *CqGLPs* and *CqHSP83*.** Quinoa root  
 372 samples treated with *Trichoderma* were assessed at 36 hpi by qRT-PCR. mRNA levels were normalized to the  
 373 *CqAct2* reference gene. Fold changes (mean  $\pm$  SE) were determined by comparing samples treated with  
 374 *Trichoderma* against mock-treated ones. Asterisks denote significant changes in the gene expression as compared  
 375 to the control treatment by qRT-PCR at 36 hpi ( $p < 0.05$ ). Symbol  $\pi$  denotes significant changes in the gene  
 376 expression as compared to the control treatment, using RNA-seq ( $p < 0.05$ ) and confirmed by qRT-PCR ( $p < 0.05$ )  
 377 at 12 hpi.

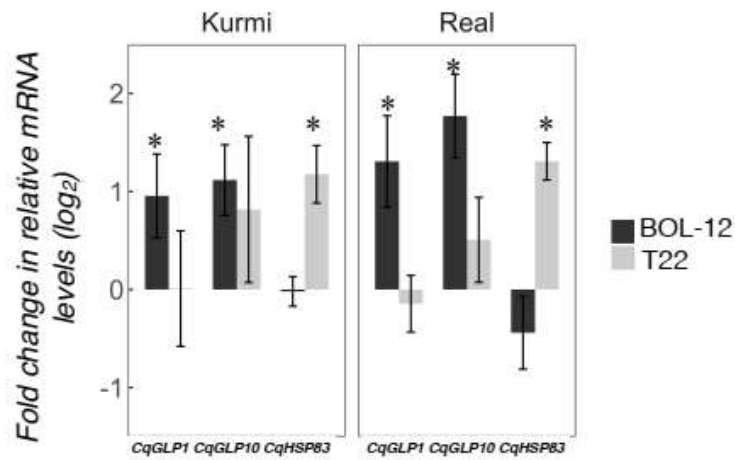

378

379 **Figure 5 Gene expression changes in quinoa shoots after treatment of roots with *Trichoderma*.** Quinoa shoot  
380 samples were assessed by qRT-PCR 36 h after treatment with *Trichoderma* to the roots. Gene expression was  
381 normalized to the *CqAct2* reference gene and is shown as mean  $\pm$  SE. Asterisks denote significant changes in the  
382 gene expression as compared to the control treatment ( $p < 0.05$ ). Two *CqGLP* genes that were induced in Kurmi  
383 roots at 12 hpi as well as the *CqHSP83* gene, which was induced in roots in all quinoa-*Trichoderma* interactions  
384 at 12 hpi are shown.

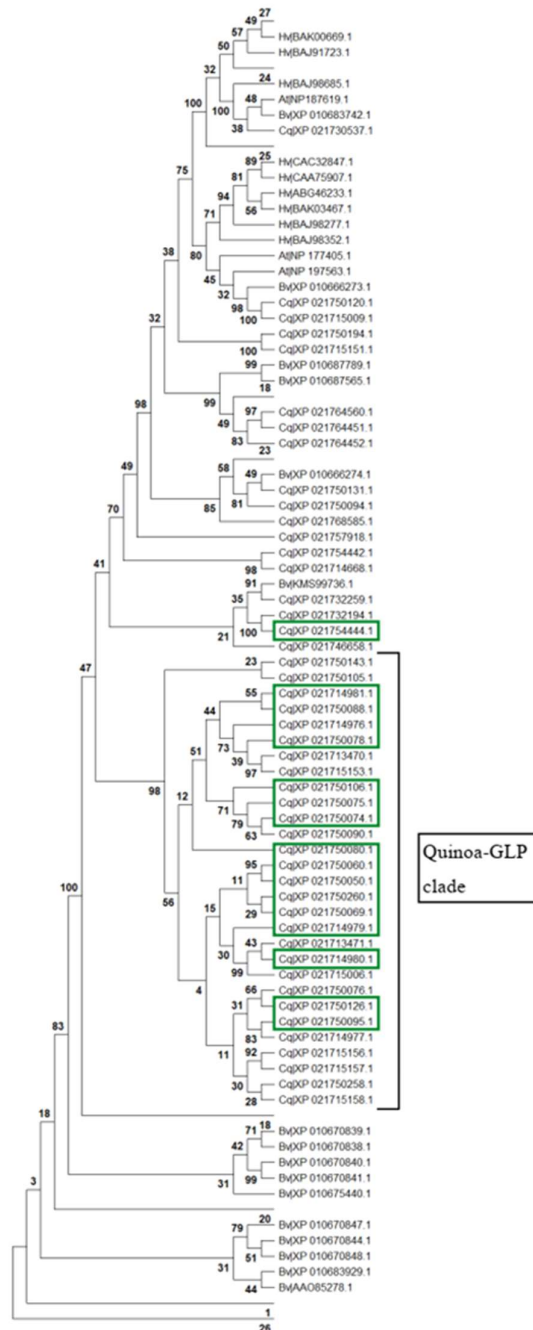

385

386 **Figure 6. Protein evolutionary tree of germin and germin-like proteins.** All identified germin-like proteins  
387 found in *C. quinoa* (Cq), *B. vulgaris* (Bv), *A. thaliana* (At) and *H. vulgare* (Hv) homologues were aligned by  
388 Muscle. The protein evolutionary tree was constructed by maximum likelihood using the LG + G model with 1000  
389 iterations. Bootstrap values are given in percentage (%). Values below 30% are not shown except for in the  
390 *Trichoderma*-responsive quinoa-specific GLP clade. The *Trichoderma*-induced homologues are marked in green.

391 **Additional files**

392 **Additional file 1: Table S1. Quinoa genes significantly upregulated in the cultivar Kurmi but not in Real.**

393 The table shows genes that were significantly upregulated in the Kurmi cultivar when treated with either BOL-12  
394 or T22. The family of GLPs is highlighted in light green. The flavonoid biosynthetic pathway is highlighted in  
395 light purple. The numbers indicate averages of CPM values for each treatment (n = 3).

396 **Additional file 2: Table S2. Quinoa genes significantly downregulated in the cultivar Kurmi but not in Real.**

397 Genes observed to be significantly downregulated in the Kurmi cultivar when treated with either BOL-12 or T22  
398 are included. The numbers indicate average of CPM values for every treatment (n = 3). CPM of reference genes  
399 are showed at the bottom for transparency.

400 **Additional file 3: Table S3. Quinoa genes significantly up- and downregulated in the cultivar Real but not**  
401 **in Kurmi.**

402 Genes shown were significantly and consistently upregulated or downregulated in the Real cultivar when treated  
403 with either BOL-12 or T22. Highlighted in green we can observe a family of chitinases. Light purple highlights  
404 WRKY genes and orange highlights ethylene-responsive genes.

405 **Additional file 4: Table S4. Singular enrichment analysis of differentially expressed genes in quinoa roots**  
406 **treated with *Trichoderma*.**

407 For each quinoa-*Trichoderma* interaction, quinoa genes differentially expressed (DE) were annotated for Gene  
408 Ontology with Argot2 and then analyzed for singular enrichment analysis with AgriGO2. Stress-related GO-term  
409 are highlighted in grey and cell wall-related terms in orange.

410 **Additional file 5: Table S5. Gene expression assessed by RNA-seq and qRT-PCR.**

411 RNA from quinoa roots treated with *Trichoderma* or mock treated (12 hpi) were analysed by RNA-seq and qRT-  
412 PCR in order to determine the correlation of expression levels. Fold change was determined by comparing samples  
413 treated with each *Trichoderma* strain against the mock-treated control.

414 **Additional file 6: Table S6. Gene expression in quinoa shoot and root at 36 hpi with *Trichoderma*.**

415 Quinoa shoot and root samples were assessed by qRT-PCR after 36 h treatment with *Trichoderma* added to the  
416 roots. Gene expression was normalized to the *CqAct2* reference gene. Fold change was determined by comparing  
417 samples treated with *Trichoderma* against mock-treated. Significant differences between treatment and control is  
418 highlighted in red. ND, not detected.

419 **Additional file 7: Table S7. Primer sequences of quinoa genes analysed by qRT-PCR.**

420 Forward and reverse primer sequences for qRT-PCR. Primer pairs were designed using Perlprimer aiming for  
421 exon-exon borders. *CqAct2* were used as reference genes for normalization of the mRNA abundances and were  
422 further verified by the *CqMon1* housekeeping gene.

423 **Additional file 8: Table S8. Quinoa GLPs significantly upregulated upon treatment with *Trichoderma*.**

424 Phytozome and NCBI codes for the germin-like proteins significantly upregulated by *Trichoderma* in the Kurmi  
425 cultivar. These GLPs belong to a quinoa-specific clade (Figure 6).

426 **Additional file 9: Table S9. Differentially expressed quinoa genes upon treatment with *Trichoderma*.**

427 Log<sub>2</sub> fold changes, log<sub>2</sub> CPM values, P-values and False Discovery Rates for the genes that were differentially  
428 expressed in any of the quinoa-*Trichoderma* interactions

429

430 **Acknowledgments**

431 We are grateful to Proinpa Institute (Quipaquipani, Bolivia) for the generous donation of quinoa seeds and the  
432 Instituto de Investigaciones Farmaco-bioquímicas - UMSA (La Paz, Bolivia) for providing *Trichoderma*  
433 *harzianum* BOL-12QD.

434 Genome mapping, read count and blastn computations were performed on resources provided by SNIC (Swedish  
435 National Infrastructure for Computing) through Uppsala Multidisciplinary Center for Advanced Computational  
436 Science (UPPMAX, Uppsala, Sweden) under Project SNIC b2015011/b2016265 along with resources provided  
437 by UMSA (Universidad Mayor de San Andrés) through Centro Nacional de Computación Avanzada para  
438 Bioinformática y Genómica (CnCaBo, La Paz, Bolivia).

439 **Funding**

440 This work was funded by the Swedish International Development Agency (SIDA) in a strategic collaboration  
441 between Universidad Mayor de San Andrés (UMSA) (Bolivia) and Lund University (Sweden); the Lars Hiertas  
442 Minne Stiftelsen (OR) and the Jörgen Lindströms Stipendiefond (OR).

443 **References**

- 444 1. Chaverri P, Branco-Rocha F, Jaklitsch W, Gazis R, Degenkolb T, Samuels GJ. Systematics of the  
445 *Trichoderma harzianum* species complex and the re-identification of commercial biocontrol strains. *Mycologia*.  
446 2015;107(3):558-90.
- 447 2. Altomare C, Norvell WA, Björkman T, Harman GE. Solubilization of Phosphates and  
448 Micronutrients by the Plant-Growth-Promoting and Biocontrol Fungus *Trichoderma harzianum* Rifai 1295-22.  
449 *Applied and Environmental Microbiology*. 1999;65(7):2926-33.
- 450 3. Jalali F, Zafari D, Salari H. Volatile organic compounds of some *Trichoderma* spp. increase  
451 growth and induce salt tolerance in *Arabidopsis thaliana*. *Fungal Ecology*. 2017;29:67-75.
- 452 4. Lee S, Yap M, Behringer G, Hung R, Bennett JW. Volatile organic compounds emitted by  
453 *Trichoderma* species mediate plant growth. *Fungal Biology and Biotechnology*. 2016;3(1):7.
- 454 5. Harman GE, Howell CR, Viterbo A, Chet I, Lorito M. *Trichoderma* species — opportunistic,  
455 avirulent plant symbionts. *Nature Reviews Microbiology*. 2004;2(1):43-56.
- 456 6. Mukherjee PK, Horwitz BA, Herrera-Estrella A, Schmoll M, Kenerley CM. *Trichoderma*  
457 Research in the Genome Era. *Annual Review of Phytopathology*. 2013;51(1):105-29.
- 458 7. Harman GE. Overview of Mechanisms and Uses of *Trichoderma* spp. *Phytopathology*.  
459 2006;96(2):190-4.
- 460 8. Rollano-Peñaloza OM, Widell S, Mollinedo P, Rasmussen AG. *Trichoderma harzianum* T-22 and  
461 BOL-12QD inhibit lateral root development of *Chenopodium quinoa* in axenic co-culture. *Cogent Biology*.  
462 2018;4(1):1-12.
- 463 9. Vega-Gálvez A, Miranda M, Vergara J, Uribe E, Puente L, Martínez EA. Nutrition facts and  
464 functional potential of quinoa (*Chenopodium quinoa* Willd.), an ancient Andean grain: a review. *Journal of the*  
465 *Science of Food and Agriculture*. 2010;90(15):2541-7.
- 466 10. Bazile D, Jacobsen SE, Verniau A. The Global Expansion of Quinoa: Trends and Limits. *Front*  
467 *Plant Sci*. 2016;7:622.
- 468 11. Ruiz KB, Biondi S, Oses R, Acuña-Rodríguez IS, Antognoni F, Martínez-Mosqueira EA, et al.  
469 Quinoa biodiversity and sustainability for food security under climate change. A review. *Agronomy for*  
470 *Sustainable Development*. 2014;34(2):349-59.
- 471 12. Repo-Carrasco R, Espinoza C, Jacobsen SE. Nutritional Value and Use of the Andean Crops  
472 Quinoa (*Chenopodium quinoa*) and Kañiwa (*Chenopodium pallidicaule*). *Food Reviews International*.  
473 2003;19(1-2):179-89.
- 474 13. Zurita-Silva A, Fuentes F, Zamora P, Jacobsen S-E, Schwember AR. Breeding quinoa  
475 (*Chenopodium quinoa* Willd.): potential and perspectives. *Molecular Breeding*. 2014;34(1):13-30.
- 476 14. Dillehay TD, Rossen J, Andres TC, Williams DE. Pre-ceramic adoption of peanut, squash, and  
477 cotton in northern Peru. *Science*. 2007;316(5833):1890-3.
- 478 15. Ortuño N, Castillo J, Claros M, Navia O, Angulo M, Barja D, et al. Enhancing the Sustainability  
479 of Quinoa Production and Soil Resilience by Using Bioproducts Made with Native Microorganisms. *Agronomy*.  
480 2013;3(4):732-46.
- 481 16. Prashar P, Vandenberg A. Genotype-specific responses to the effects of commercial *Trichoderma*  
482 formulations in lentil (*Lens culinaris* ssp. *culinaris*) in the presence and absence of the oomycete pathogen  
483 *Aphanomyces euteiches*. *Biocontrol Science and Technology*. 2017;27(10):1123-44.
- 484 17. Tucci M, Ruocco M, De Masi L, De Palma M, Lorito M. The beneficial effect of *Trichoderma*  
485 spp. on tomato is modulated by the plant genotype. *Molecular Plant Pathology*. 2011;12(4):341-54.
- 486 18. Yedidia I, Benhamou N, Chet I. Induction of defense responses in cucumber plants (*Cucumis*  
487 *sativus* L.) by the biocontrol agent *Trichoderma harzianum*. *Applied and Environmental Microbiology*.  
488 1999;65(3):1061-70.
- 489 19. Abramoff MD, Magalhães PJ, Ram SJ. Image processing with ImageJ. *Biophotonics*  
490 *international*. 2004.
- 491 20. Jarvis DE, Ho YS, Lightfoot DJ, Schmöckel SM, Li B, Borm TJA, et al. The genome of  
492 *Chenopodium quinoa*. *Nature*. 2017;542(7641):307-12.
- 493 21. Anders S, McCarthy DJ, Chen Y, Okoniewski M, Smyth GK, Huber W, et al. Count-based  
494 differential expression analysis of RNA sequencing data using R and Bioconductor. *Nat Protoc*. 2013;8(9):1765-  
495 86.
- 496 22. Robinson MD, McCarthy DJ, Smyth GK. edgeR: a Bioconductor package for differential  
497 expression analysis of digital gene expression data. *Bioinformatics*. 2010;26(1):139-40.
- 498 23. Dillies MA, Rau A, Aubert J, Hennequet-Antier C, Jeanmougin M, Servant N, et al. A  
499 comprehensive evaluation of normalization methods for Illumina high-throughput RNA sequencing data  
500 analysis. *Brief Bioinform*. 2013;14(6):671-83.

- 501 24. Benjamini Y, Hochberg Y. Controlling the False Discovery Rate: A Practical and Powerful  
502 Approach to Multiple Testing. *Journal of the Royal Statistical Society Series B (Methodological)*.  
503 1995;57(1):289-300.
- 504 25. Falda M, Toppo S, Pescarolo A, Lavezzo E, Di Camillo B, Facchinetti A, et al. Argot2: a large  
505 scale function prediction tool relying on semantic similarity of weighted Gene Ontology terms. *BMC*  
506 *Bioinformatics*. 2012;13 Suppl 4:S14.
- 507 26. Du Z, Zhou X, Ling Y, Zhang Z, Su Z. agriGO: a GO analysis toolkit for the agricultural  
508 community. *Nucleic Acids Res*. 2010;38(Web Server issue):W64-70.
- 509 27. Tian T, Liu Y, Yan H, You Q, Yi X, Du Z, et al. agriGO v2.0: a GO analysis toolkit for the  
510 agricultural community, 2017 update. *Nucleic Acids Res*. 2017;45(W1):W122-W9.
- 511 28. Pfaffl MW. A new mathematical model for relative quantification in real-time RT-PCR. *Nucleic*  
512 *Acids Res*. 2001;29(9):e45.
- 513 29. Marshall OJ. PerlPrimer: cross-platform, graphical primer design for standard, bisulphite and real-  
514 time PCR. *Bioinformatics*. 2004;20(15):2471-2.
- 515 30. Edgar RC. MUSCLE: multiple sequence alignment with high accuracy and high throughput.  
516 *Nucleic Acids Research*. 2004;32(5):1792-7.
- 517 31. Kumar S, Stecher G, Li M, Knyaz C, Tamura K. MEGA X: Molecular Evolutionary Genetics  
518 Analysis across Computing Platforms. *Molecular biology and evolution*. 2018;35(6):1547-9.
- 519 32. Le SQ, Gascuel O. An improved general amino acid replacement matrix. *Molecular biology and*  
520 *evolution*. 2008;25(7):1307-20.
- 521 33. Dao TT, Linthorst HJ, Verpoorte R. Chalcone synthase and its functions in plant resistance.  
522 *Phytochem Rev*. 2011;10(3):397-412.
- 523 34. Ilyas M, Rasheed A, Mahmood T. Functional characterization of germin and germin-like protein  
524 genes in various plant species using transgenic approaches. *Biotechnology Letters*. 2016;38(9):1405-21.
- 525 35. De Lorenzo G, Ferrari S. Polygalacturonase-inhibiting proteins in defense against  
526 phytopathogenic fungi. *Current opinion in plant biology*. 2002;5(4):295-9.
- 527 36. Miedes E, Lorences EP. The implication of xyloglucan endotransglucosylase/hydrolase (XTHs) in  
528 tomato fruit infection by *Penicillium expansum* Link. *A. Journal of agricultural and food chemistry*.  
529 2007;55(22):9021-6.
- 530 37. Zhang X-C, Millet YA, Cheng Z, Bush J, Ausubel FM. Jasmonate signalling in *Arabidopsis*  
531 involves SGT1b-HSP70-HSP90 chaperone complexes. *Nature Plants*. 2015;1:15049.
- 532 38. Takahashi A, Casais C, Ichimura K, Shirasu K. HSP90 interacts with RAR1 and SGT1 and is  
533 essential for RPS2-mediated disease resistance in *Arabidopsis*. *Proceedings of the National Academy of*  
534 *Sciences of the United States of America*. 2003;100(20):11777-82.
- 535 39. Hubert DA, Tornero P, Belkhadir Y, Krishna P, Takahashi A, Shirasu K, et al. Cytosolic HSP90  
536 associates with and modulates the *Arabidopsis* RPM1 disease resistance protein. *EMBO J*. 2003;22(21):5679-89.
- 537 40. Pieterse CMJ, Leon-Reyes A, Van der Ent S, Van Wees SCM. Networking by small-molecule  
538 hormones in plant immunity. *Nature Chemical Biology*. 2009;5(5):308-16.
- 539 41. Mathys J, De Cremer K, Timmermans P, Van Kerkhove S, Lievens B, Vanhaecke M, et al.  
540 Genome-wide characterization of ISR induced in *Arabidopsis thaliana* by *Trichoderma hamatum* T382 against  
541 *Botrytis cinerea* infection. *Frontiers in Plant Science*. 2012;3:108.
- 542 42. Salas-Marina MA, Silva-Flores MA, Uresti-Rivera EE, Castro-Longoria E, Herrera-Estrella A,  
543 Casas-Flores S. Colonization of *Arabidopsis* roots by *Trichoderma atroviride* promotes growth and enhances  
544 systemic disease resistance through jasmonic acid/ethylene and salicylic acid pathways. *European Journal of*  
545 *Plant Pathology*. 2011;131(1):15-26.
- 546 43. Dixon RA. Natural products and plant disease resistance. *Nature*. 2001;411(6839):843-7.
- 547 44. Treutter D. Significance of flavonoids in plant resistance: a review. *Environmental Chemistry*  
548 *Letters*. 2006;4(3):147-57.
- 549 45. Boachon B, Gamir J, Pastor V, Erb M, Dean JV, Flors V, et al. Role of two UDP-  
550 Glycosyltransferases from the L group of arabisidopsis in resistance against *Pseudomonas syringae*. *European*  
551 *journal of plant pathology*. 2014;139(4):707-20.
- 552 46. Cheng P, Gedling CR, Patil G, Vuong TD, Shannon JG, Dorrance AE, et al. Genetic mapping and  
553 haplotype analysis of a locus for quantitative resistance to *Fusarium graminearum* in soybean accession PI  
554 567516C. *Theoretical and applied genetics*. 2017;130(5):999-1010.
- 555 47. Zimmermann G, Baumlein H, Mock H-P, Himmelbach A, Schweizer P. The multigene family  
556 encoding germin-like proteins of barley. Regulation and function in basal host resistance. *Plant Physiology*.  
557 2006;142(1):181-92.

- 558 48. Dunwell JM, Gibbings JG, Mahmood T, Saqlan Naqvi SM. Germin and Germin-like Proteins:  
559 Evolution, Structure, and Function. *Critical Reviews in Plant Sciences*. 2008;27(5):342-75.
- 560 49. Livingstone DM, Hampton JL, Phipps PM, Grabau EA. Enhancing resistance to *Sclerotinia minor*  
561 in peanut by expressing a barley oxalate oxidase gene. *Plant Physiology*. 2005;137(4):1354-62.
- 562 50. Liu F, Wang M, Wen J, Yi B, Shen J, Ma C, et al. Overexpression of barley oxalate oxidase gene  
563 induces partial leaf resistance to *Sclerotinia sclerotiorum* in transgenic oilseed rape. *Plant Pathology*.  
564 2015;64(6):1407-16.
- 565 51. Pritsch C, Muehlbauer GJ, Bushnell WR, Somers DA, Vance CP. Fungal development and  
566 induction of defense response genes during early infection of wheat spikes by *Fusarium graminearum*.  
567 *Molecular Plant-Microbe Interactions*. 2000;13(2):159-69.
- 568 52. Venisse J-S, Malnoy M, Faize M, Paulin J-P, Brisset M-N. Modulation of defense responses of  
569 *Malus* spp. during compatible and incompatible interactions with *Erwinia amylovora*. *Molecular Plant-Microbe*  
570 *Interactions*. 2002;15(12):1204-12.
- 571 53. Nakagawa T, Kaku H, Shimoda Y, Sugiyama A, Shimamura M, Takanashi K, et al. From defense  
572 to symbiosis: limited alterations in the kinase domain of LysM receptor-like kinases are crucial for evolution of  
573 legume-*Rhizobium* symbiosis. *The Plant Journal*. 2011;65(2):169-80.
- 574 54. Brotman Y, Landau U, Cuadros-Inostroza A, Takayuki T, Fernie AR, Chet I, et al. *Trichoderma*-  
575 Plant Root Colonization: Escaping Early Plant Defense Responses and Activation of the Antioxidant Machinery  
576 for Saline Stress Tolerance. *PLoS Pathog*. 2013;9(3):e1003221.
- 577 55. Vos CMF, De Cremer K, Cammue BPA, De Coninck B. The toolbox of *Trichoderma* spp. in the  
578 biocontrol of *Botrytis cinerea* disease. *Molecular Plant Pathology*. 2015;16(4):400-12.
- 579 56. De Palma M, Salzano M, Villano C, Aversano R, Lorito M, Ruocco M, et al. Transcriptome  
580 reprogramming, epigenetic modifications and alternative splicing orchestrate the tomato root response to the  
581 beneficial fungus *Trichoderma harzianum*. *Horticulture research*. 2019;6(1):5.
- 582 57. Ho C-L, Tan Y-C, Yeoh K-A, Ghazali A-K, Yee W-Y, Hoh C-C. De novo transcriptome analyses  
583 of host-fungal interactions in oil palm (*Elaeis guineensis* Jacq.). *BMC genomics*. 2016;17(1):66.
- 584 58. Yasui Y, Hirakawa H, Oikawa T, Toyoshima M, Matsuzaki C, Ueno M, et al. Draft genome  
585 sequence of an inbred line of *Chenopodium quinoa* an allotetraploid crop with great environmental adaptability  
586 and outstanding nutritional properties. *DNA Research*. 2016:dsw037.
- 587



**Table 1.** RNA-seq summary of read numbers mapped to two quinoa reference genomes

| <b>Quinoa cv.</b> | <b>Treatment</b> | <b>Sample</b> | <b>Total reads<sup>a</sup></b> | <b>Mapped reads<sup>b</sup></b> | <b>%</b> | <b>Mapped reads<sup>c</sup></b> | <b>%</b> | <b>Unique reads<sup>d</sup></b> | <b>%</b> | <b>Multi-reads<sup>e</sup></b> | <b>%</b> |
|-------------------|------------------|---------------|--------------------------------|---------------------------------|----------|---------------------------------|----------|---------------------------------|----------|--------------------------------|----------|
| Kurmi             | Mock             | 1             | 12609683                       | 8902151                         | 70.6     | 11717393                        | 92.9     | 10428786                        | 89.0     | 1288607                        | 11.0     |
|                   |                  | 2             | 13360579                       | 9462168                         | 70.8     | 12431446                        | 93.0     | 11075758                        | 89.1     | 1355688                        | 10.9     |
|                   |                  | 3             | 14186924                       | 10144341                        | 71.5     | 13301928                        | 93.8     | 11987944                        | 90.1     | 1313984                        | 9.9      |
| Kurmi             | BOL-12           | 1             | 13017241                       | 9321854                         | 71.6     | 12231647                        | 94.0     | 10952241                        | 89.5     | 1279406                        | 10.5     |
|                   |                  | 2             | 11571126                       | 8301337                         | 71.7     | 10906882                        | 94.3     | 9758090                         | 89.5     | 1148792                        | 10.5     |
|                   |                  | 3             | 14321132                       | 10211966                        | 71.3     | 13449878                        | 93.9     | 12018768                        | 89.4     | 1431110                        | 10.6     |
| Kurmi             | T-22             | 1             | 12371536                       | 8500983                         | 68.7     | 11225637                        | 90.7     | 9860686                         | 87.8     | 1364951                        | 12.2     |
|                   |                  | 2             | 11390953                       | 8151138                         | 71.6     | 10691577                        | 93.9     | 9582419                         | 89.6     | 1109158                        | 10.4     |
|                   |                  | 3             | 13144501                       | 9423642                         | 71.7     | 12345436                        | 93.9     | 11154456                        | 90.4     | 1190980                        | 9.6      |
| Real              | Mock             | 1             | 14414857                       | 10423990                        | 72.3     | 13597954                        | 94.3     | 12178545                        | 89.6     | 1419409                        | 10.4     |
|                   |                  | 2             | 14949701                       | 10780918                        | 72.1     | 14143244                        | 94.6     | 12694852                        | 89.8     | 1448392                        | 10.2     |
|                   |                  | 3             | 13625079                       | 9759644                         | 71.6     | 12839479                        | 94.2     | 11778409                        | 91.7     | 1061070                        | 8.3      |
| Real              | BOL-12           | 1             | 10245775                       | 7405797                         | 72.3     | 9599526                         | 93.7     | 8553892                         | 89.1     | 1045634                        | 10.9     |
|                   |                  | 2             | 11350821                       | 8261409                         | 72.8     | 10425272                        | 91.8     | 9259149                         | 88.8     | 1166123                        | 11.2     |

|      |      |          |          |          |          |          |          |          |         |         |     |
|------|------|----------|----------|----------|----------|----------|----------|----------|---------|---------|-----|
|      | 3    | 12542586 | 9091486  | 72.5     | 11767298 | 93.8     | 10725657 | 91.1     | 1041641 | 8.9     |     |
| Real | 1    | 23140059 | 17009224 | 73.5     | 21733959 | 93.9     | 19385551 | 89.2     | 2348408 | 10.8    |     |
|      | T-22 | 2        | 14568308 | 10646741 | 73.1     | 13743816 | 94.3     | 12645961 | 92.0    | 1097855 | 8.0 |
|      |      | 3        | 11039194 | 8047239  | 72.9     | 10305738 | 93.4     | 9304963  | 90.3    | 1000775 | 9.7 |

<sup>a</sup> Total reads that passed the quality control per biological replicate in each treatment

<sup>b</sup> Average between right and left reads mapped with Tophat2 to the inbred Kd quinoa genome (58).

<sup>c</sup> Average between right and left reads mapped with Tophat2 to the QQ74 coastal quinoa genome (20).

<sup>d</sup> Unique reads mapped to the QQ74 coastal quinoa genome.

<sup>e</sup> Reads mapped to multiple positions

**Table 2.** Differentially expressed genes in quinoa roots treated with *Trichoderma*

| <b>Quinoa</b> | <b>Experiment</b>       | <b>Induced</b> | <b>Repressed</b> | <b>Total</b> | <b>Ind/Repr</b> | <b>Genes evaluated<sup>a</sup></b> |
|---------------|-------------------------|----------------|------------------|--------------|-----------------|------------------------------------|
| Kurmi         | BOL-12 vs. mock-treated | 158            | 38               | 196          | 4.2             | 25 273                             |
| Kurmi         | T22 vs. mock-treated    | 1417           | 1727             | 3144         | <b>0.8</b>      | 25 379                             |
| Real          | BOL-12 vs. mock-treated | 277            | 76               | 353          | 3.6             | 30 108                             |
| Real          | T22 vs. mock-treated    | 1170           | 139              | 1309         | <b>8.4</b>      | 30 745                             |

<sup>a</sup> Genes included had at least one read in each of the samples. The quinoa genome annotation contains 44 776 genes.

**Table 3.** Quinoa genes differentially expressed in both Kurmi and Real in response to both *Trichoderma* strains

|                          |                               |                                                                       | Quinoa                    |                |                  |              |            |                      |
|--------------------------|-------------------------------|-----------------------------------------------------------------------|---------------------------|----------------|------------------|--------------|------------|----------------------|
| Quinoa gene abbreviation | Quinoa gene code <sup>a</sup> | Gene name                                                             | Araport Code <sup>b</sup> | protein length | Alignment length | Identity (%) | GO e-value | Cellular component   |
| <i>CqXTH6A</i>           | AUR62024859                   | Xyloglucan endotransglucosylase/hydrolase 6                           | AT4G25810.1               | 285            | 284              | 70,1         | 3E-154     | apoplast             |
| <i>CqXTH6B</i>           | AUR62024861                   | Xyloglucan endotransglucosylase/hydrolase 6                           | AT4G25810.1               | 286            | 284              | 71,5         | 1E-151     | apoplast             |
| <i>EXL4</i>              | AUR62018945                   | Protein Exordium-like 4                                               | AT4G08950.1               | 311            | 298              | 67,5         | 4E-143     | cell wall            |
| <i>CqPGIPA</i>           | AUR62012077                   | Polygalacturonase inhibitor protein                                   | AT5G06860.1               | 311            | 311              | 48,6         | 6E-82      | cell wall            |
| <i>CqPGIPB</i>           | AUR62024339                   | Polygalacturonase inhibitor protein                                   | AT3G12145.1               | 333            | 329              | 44,4         | 3E-80      | cell wall            |
| <i>CqChit1</i>           | AUR62021382                   | Glycosyl hydrolase with chitinase insertion domain-containing protein | AT4G19810.2               | 364            | 368              | 47,0         | 3E-113     | extracellular region |
| <i>CYP707A1</i>          | AUR62010485                   | Abscisic acid 8'-hydroxylase 1                                        | AT4G19230.1               | 450            | 465              | 74,2         | 0E+00      | plasmodesmata        |
| <i>PUB27</i>             | AUR62013534                   | U-box domain-containing protein 27                                    | AT5G64660.1               | 392            | 424              | 40,3         | 4E-87      | plasmodesmata        |
| <i>CqEP3.3</i>           | AUR62031316                   | Basic endochitinase C, homolog of carrot EP3-3                        | AT3G54420.1               | 242            | 232              | 62,9         | 1E-104     | plasma membrane      |
| <i>NN</i>                | AUR62029900                   | Protein of unknown function                                           | AT1G68390.1               | 286            | 216              | 60,2         | 1E-96      | plasma membrane      |
| <i>AUR62005356</i>       | AUR62005356                   | Transmembrane protein                                                 | AT1G23830.1               | 253            | 138              | 39,1         | 3E-22      | plasma membrane      |
| <i>SD25</i>              | AUR62006585                   | G-type lectin S-receptor-like serine/threonine-protein kinase SD2-5   | AT4G32300.1               | 831            | 789              | 35,1         | 4E-124     | plasma membrane      |
| <i>Atlg35710</i>         | AUR62039001                   | Probable leucine-rich repeat receptor-like protein kinase             | AT1G35710.1               | 478            | 451              | 37,3         | 5E-66      | plasma membrane      |
| <i>CqHSP83a</i>          | AUR62031424                   | Heat-shock protein 83                                                 | AT5G52640.1               | 579            | 443              | 92,6         | 0E+00      | cytoplasm            |

|                    |             |                                                   |             |     |     |      |        |               |
|--------------------|-------------|---------------------------------------------------|-------------|-----|-----|------|--------|---------------|
| <i>CqHSP83b</i>    | AUR62021118 | Heat-shock protein 83-like                        | AT5G52640.1 | 703 | 700 | 93,1 | 0E+00  | cytoplasm     |
| <i>CXE2</i>        | AUR62014711 | Probable carboxylesterase 2                       | AT1G47480.1 | 304 | 301 | 50,5 | 7E-109 | cytosol       |
| <i>AUR62011434</i> | AUR62011434 | Protein of unknown function                       | AT2G26530.1 | 269 | 184 | 33,7 | 2E-16  | intracellular |
| <i>CIGR1</i>       | AUR62001765 | Chitin-inducible GRAS family transcription factor | AT2G29060.2 | 690 | 626 | 43,3 | 1E-165 | nucleus       |
| <i>ERF071</i>      | AUR62025525 | Ethylene-responsive transcription factor ERF071   | AT2G47520.1 | 249 | 217 | 42,9 | 3E-44  | nucleus       |
| <i>CqWRKY33*</i>   | AUR62006298 | WRKY33 transcription factor                       | AT2G38470.1 | 454 | 487 | 46,8 | 7E-116 | nucleus       |

All genes commonly differentially expressed in all plant-*Trichoderma* combinations were induced.

<sup>a</sup> Genes annotated in the Quinoa QQ74 genome (Jarvis et al., 2017) curated with information from their closest ortholog in *A.*

*thaliana*

<sup>b</sup> Gene codes from the *Arabidopsis* Information portal Araport.

\* *CqWRKY33* was included in the list of genes because significant difference respective to the control was confirmed by qRT-PCR (Fig. 5)
